# Supplementary material
Source: Springer Nature journal article supplement (https://www.springermedizin.de/resource/supplementary/12961_2008_78_MOESM4_ESM.pdf/9571428)
Supplement: MOESM4 [file 9571428]

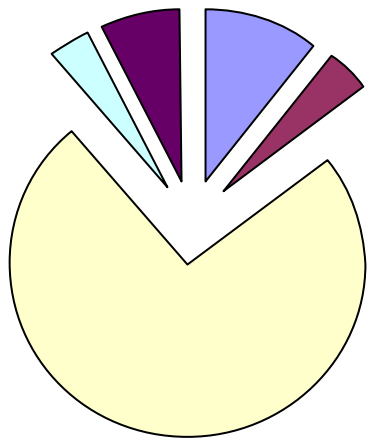

- Own-source revenue
- Shared taxes and natural resource revenues
- General allocation grant (Dana Alokasi Umum - DAU)
- Special allocation grant (Dana Alokasi Khusus - DAK)
- Other revenues

Source: Data from (8).
